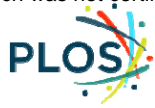

1

2

3

## Exploring causal effects of smoking and alcohol related lifestyle factors on self-report tiredness: a Mendelian randomization study

4

5

6 Heshan Li<sup>1¶</sup>, Junru Zhao<sup>2¶</sup>, Jing Liang<sup>3¶</sup>, Xiaoyu Song<sup>1\*</sup>

7

8

9

10 <sup>1</sup>School of Life Sciences and Technology, Harbin Institute of Technology, Harbin, China

11

12 <sup>2</sup>School of Mathematical Sciences, Harbin Engineering University, Harbin, China

13

14 <sup>3</sup>Harbin Huaqiang Power Automation Engineering Company Limited, Harbin, China

15

16

17 \* Corresponding Author

18 [Email: songxyhit@hit.hit.edu.cn](mailto:songxyhit@hit.hit.edu.cn) (XS)

19

20

21 ¶These authors contributed equally to this work and share first authorship

22

23

24

25

## 26 **Abstract**

27 Self-reported tiredness or low energy, often referred to as fatigue, has been linked to lifestyle  
28 factors, although data from randomized–controlled trials are lacking. We investigate whether  
29 modifiable lifestyle factors including smoking and alcohol intake related exposures (SAIEs) are  
30 causal factors for fatigue using Mendelian randomization (MR). A two-sample MR study was  
31 performed by using genome-wide association summary results from UK Biobank (UKBB), and each  
32 of the sample size is more than 100,000. We used the inverse variance weighted method, and  
33 sensitivity analyses (MR Egger, weighted median and penalized median estimators) to account for  
34 pleiotropy. The two-sample MR analyses showed inverse causal effect of never-smoking status and  
35 positive effect of current smoking status on the risk of fatigue. Similarly, genetically predicted  
36 alcoholic intake was positively associated with fatigue. The results were consistent across the  
37 different MR methods. Our Mendelian randomization analyses do support that the cessation of  
38 smoking and alcohol can decrease the risk of fatigue, and limit alcohol intake frequency can also  
39 reduce the risk.

## 40 **Author summary**

41 Many lifestyle factors have been associated with the risk of fatigue, but we cannot ascertain  
42 the causality between lifestyle factors and the risk of fatigue; whether the modification of lifestyles  
43 will reduce the risk. Another challenge is that fatigue is usually caused by various physiological and  
44 pathological factors, so most epidemiological data which examined risk factor modification have not  
45 studied the relationship between modifiable risk factors and self-reported tiredness in extensive  
46 conditions. SAIEs are the ones of the most influential lifestyle factors for human health and  
47 wellbeing. We performed MR analyses to estimate the causal effect of SAIEs on fatigue. In our  
48 study, we initially identified genetic variants which are significantly associated with SAIEs. We

## Mendelian randomization study of lifestyle factors on self-report tiredness

49 found SAIEs are causally involved in fatigue. The results could be extremely useful in the context of  
50 lifestyle - health relationships.

### 51 **Introduction**

52 Self-reported tiredness and low energy are often called fatigue which is widespread in the  
53 population [1–5]. It is a common presentation in primary care [6-9]. While many lifestyle factors  
54 have been associated with fatigue, the causality of the association of lifestyle factors with fatigue  
55 remains unestablished. The first challenge is that demonstrating the causality with observational  
56 epidemiological studies is **infeasible** due to biases such as confounding and reverse causation. One  
57 way to assess causality is with Mendelian randomization (MR), which uses genetic variants as  
58 instrumental variables in an approach analogous to a randomized controlled trial, to assess whether  
59 risk factors have causal associations with an outcome of interest [10-12].

60 Another challenge is that fatigue is both heterogeneous (occurring in different conditions) and  
61 multifactorial, and it is commonly unexplained by underlying disease [7, 13]. It is the complexity of  
62 fatigue that makes it infeasible to discern its causal link with lifestyle factors via observational  
63 studies. Most epidemiological data examining risk factor modification have studied the relationships  
64 between modifiable risk factors and fatigue in a specific sample and under a certain condition.

65 We performed a two-sample Mendelian randomization analysis – including inverse variance  
66 weighted (IVW), MR-Egger regression, weighted median estimator, and penalized weighted median  
67 estimator – to investigate the etiological role of the two most important modifiable lifestyle factors  
68 (smoking and alcohol intake related exposures) on fatigue with unlimited samples.

### 69 **Methods**

70 We undertook Mendelian randomization analyses to estimate effects of SAIEs on fatigue in a  
71 two-sample Mendelian randomization framework. The Mendelian randomization approach was based  
72 on the following assumptions, which have been widely described in recent studies [14-16]:

- 73 1. The genetic variants used as instrumental variables (IVs) are predictive of the exposure.
- 74 2. IVs are independent of any confounders of the exposure-outcome relationship.
- 75 3. IVs are associated with outcomes only through the clinical risk factors, that is, a lack of  
76 pleiotropy (Fig 1).

77  
78 **Fig 1. A directed acyclic graph illustrating core instruments variable assumptions of the Mendelian**  
79 **randomization approach.** IV assumption 1: IVs are strongly correlated with exposures. IV assumption 2: IVs  
80 are independent of outcomes (i.e., IVs can only affect outcomes through exposures). IV assumption 3: IVs are  
81 not related to confounding factors. IV: instrument variable.

82  
83 These assumptions imply that there is only one causal pathway from the genetic variant to the  
84 outcome via the risk factor, and no other causal pathway either directly or indirectly to the outcome  
85 [16]. A diagram corresponding to these assumptions is presented in Fig 1.

86 Publicly available summary results of SAIE – effect estimates and their standard errors for  
87 each single-nucleotide polymorphism (SNP) 's effect on exposures and fatigue – were used for the  
88 main Mendelian randomization analysis and therefore no additional ethics approval was required.

## 89 **Two-sample MR analyses**

## Mendelian randomization study of lifestyle factors on self-report tiredness

### 90 **Data sources and processing**

91 Genome-wide significant ( $P < 5 \times 10^{-8}$ ) genetic variants of predicted SAIE were extracted  
92 to satisfy IV assumption 1, and the insignificant genetic variants of self-reported fatigue were  
93 extracted to satisfy IV assumption 3. Consequently, their intersection was analyzed by MR analyses.

94 Genetic variants should be further processed into smaller datasets that meet IV assumptions.  
95 First of all, we removed genetic variants with linkage disequilibrium (LD). LD induces correlation  
96 between two genetic variants, and destroys the randomness of genetic variants [17, 18]. After SNPs  
97 with potential LD were removed, the parts with longer physical distance (more than 10,000kb) and  
98 less possibility of LD ( $R^2 < 0.001$ ) were retained. Besides, genetic variants of palindromic and  
99 incompatible alleles should be removed when we harmonized the exposure and outcome datasets.

100 *Smoking related exposures.* 70 SNPs that were significantly associated with never-smoking status  
101 were extracted from summary results data, which belongs to a GWAS of UKBB (N =359,706  
102 individuals of European ancestry). We also extracted 13 SNPs significantly associated with current-  
103 smoking status from summary results data, which belongs to a GWAS of UKBB (N =336,024  
104 individuals of European ancestry). The SNPs significantly associated with smoking status are listed  
105 in Table A in S1 Table.

106 *Alcohol intake related exposures.* Only one SNP that was significantly associated with never-  
107 drinking alcohol status was extracted from summary results, which belongs to a GWAS of UKBB (N  
108 =336,965 individuals of European ancestry). We extracted three SNPs significantly associated with  
109 current-drinking alcohol status, which belong to summary results from a GWAS of UKBB (N  
110 =360,726 individuals of European ancestry). Besides this, we extracted 90 SNPs significantly  
111 associated with alcohol intake frequency (AIF) from summary results, which belong to a GWAS of

112 UKBB (N =462,346 individuals of European ancestry). The SNPs significantly associated with  
113 alcohol intake are listed in Table C in S1 Table.

114 *self-reported tiredness*. We obtained summary results statistics from the GWAS of UKBB. The  
115 GWAS of self-reported tiredness included 449,019 individuals, who reported their own tiredness or  
116 lethargy in last weeks.

## 117 **Statistical analysis**

118 To investigate the causal relationship between SAIE and fatigue, we initially performed two-  
119 sample inverse variance weighted MR analyses by the SNPs extracted from GWAS summaries [19].  
120 The magnitude of the causal effect ( $\hat{\beta}_{IVW}$ ) was estimated as the average of the SNP-outcome effect  
121 ( $\hat{\beta}_{ZY}$ ) divided by the SNP-exposure effect ( $\hat{\beta}_{ZX}$ ). The regression slope (ratio) in IVW analysis is  
122 forced through a zero intercept. Analyses were performed with the Two-Sample MR package [20].

123 To avoid the violation of the IV assumptions 2 and 3, we assessed instrument strength for the  
124 standard IVW MR analysis via calculating the approximate F statistics for each of exposures that will  
125 be used in our two-sample MR studies [ i. e.  $F \approx (\beta/SE)^2$  shown in Table A and C in S1 Table].

126 To test whether all the IVs satisfy the IV assumptions, we performed a test of heterogeneity  
127 of causal effect estimates across each of the SNPs via Cochran's Q value quantifying heterogeneity  
128 and detecting outliers. If an individual SNP's Q contribution is extremely large (i.e. , above the 5%  
129 threshold of 3.84 or instead of a Bonferroni-corrected threshold) , it might imply heterogeneity,  
130 including horizontal pleiotropy [21,22].Then we used MR Egger regression to further investigate the  
131 possibility of directional pleiotropy in our data (i.e. where some SNPs influence the outcome via  
132 additional paths other than via the exposure), and further verified such pleiotropy with funnel plots,  
133 which plot instrument strength against the causal estimates for all the IVs. Asymmetry in funnel plots  
134 suggests that pleiotropic effects are not balanced and may indicate directional pleiotropy.

## Mendelian randomization study of lifestyle factors on self-report tiredness

### 135 **Sensitivity analyses**

136 As the resulting IVW analysis suffers from bias and invalid IVs [23], we performed  
137 sensitivity analyses via three additional MR models, i.e., MR Egger regression, the weighted median  
138 estimator, penalized weighted median estimator, to obtain more robust estimates [24]. All the  
139 following sensitivity analyses were subsequently performed upon exclusion and inclusion of outliers  
140 respectively, which were identified through Cochran's Q statistics.

141 In the case of MR Egger regression analysis, we also assessed instrument strength using an  
142  $I_{GX}^2$  statistic because F statistics from the individual marks are not sufficient indicators of instrument  
143 strength [25]. Bowden showed that an  $I_{GX}^2$  statistic can be used to quantify the expected dilution of  
144 MR Egger regression estimates [25]. He showed that a high value of  $I_{GX}^2$  (i.e. close to one) would  
145 indicate no dilution. On the contrary, if  $I_{GX}^2$  is less than 0.9, inference from MR Egger should be  
146 interpreted with caution, and some alternative sensitivity analyses should be considered [26,27].

147 In contrast to the weighted mean used in the IVW analysis, the weighted median estimator  
148 uses the weighted median of the ratio (i.e., the ratio of  $\hat{\beta}_{ZY}$  and  $\hat{\beta}_{ZX}$ ). In the weighted regression  
149 model, the penalized weighted median approach downweights (or penalizes) the contribution of some  
150 candidate variants with heterogeneous ratio estimates, and may have better finite sample properties  
151 than weighted median, particularly if there is directional pleiotropy [24].

152 If the four MR models (IVW, MR Egger regression, weighted median estimator, penalized  
153 weighted median), which make different assumptions regarding instrument validity, produce similar  
154 estimates of causal effects, then we will be more confident in the robustness of our findings.

155 We used the Two-Sample MR package (version 0.5.6) in R (version 4.1.3) to perform IVW,  
156 MR Egger regression, weighted median, and penalized median estimator. We used the codes  
157 provided on <https://mrcieu.github.io/TwoSampleMR/> to run analyses.

## 158 Results

### 159 Smoking status

160 In this section, we analysed two types of smoking status (never-smoking status vs current-  
161 smoking status) to investigate the causal effects of smoking exposures on fatigue outcome.

162 *Never-smoking status.* The two-sample MR IVW analysis showed evidence for a negative causal  
163 effect of never-smoking status on fatigue. This was supported by median-based model and penalized  
164 MR model both before and after outliers extraction (Fig 2 and 3).

165 **Fig 2. The Mendelian Randomization analysis of smoking status (never vs current) on fatigue including**  
166 **outliers.** OR = odds ratio per unit decreases in smoking status (never vs current). Forest plot comparing results  
167 from inverse variance weighted, weighted median, penalized median and MR Egger methods. CI: confidence  
168 interval.

169 There was evidence of heterogeneity in the causal effect estimates of never-smoking status on  
170 fatigue across the individual SNPs ( $Q=172.4$ ,  $P = 8.21 \times 10^{-11}$ ). On the one hand, the estimate of  
171 the intercept of MR Egger regression showed no evidence of directional horizontal pleiotropy for  
172 never-smoking status exposure (Egger intercept was  $-0.0012$  and its p-value was  $0.53$ ). But MR  
173 Egger result from never-smoking status analysis would be unreliable due to the low  $I^2_{GX}$  statistic of  
174  $0.67$  which was below the suggested cut-off of  $0.9$ , suggesting that the MR Egger results could be  
175 influenced by measurement error or weak instruments bias. On the other hand, there was an  
176 abundance of asymmetry of the funnel plots suggesting there was directional horizontal pleiotropy  
177 among our data (Fig A in S1 Note).



## Mendelian randomization study of lifestyle factors on self-report tiredness

178 *current smoking status*. The two-sample MR model showed evidence for a positive casual effect of  
179 current smoking status on fatigue both before and after the outliers extraction (Fig 2 and 3). This was  
180 also supported by median-based and penalized MR models.

181 **Fig 3. The Mendelian Randomization analysis of SST and AIF on fatigue after outliers extraction.** OR = odds  
182 ratio per unit decreases in SST and AIF. Forest plot comparing results from inverse variance weighted, weighted  
183 median, penalized median and MR Egger methods. CI: confidence interval; SST: smoking status: never vs current;  
184 AIF: alcohol intake frequency.

185 Our analysis suggested no significant evidence of horizontal pleiotropy (as indicated by MR-  
186 Egger regression intercept was -0.0035, with a  $P$  value larger than 0.05 shown in Table J in S1  
187 Table). But the low  $I_{GX}^2$  statistic of 0.86, below the suggested cut-off of 0.9, indicates that the MR  
188 Egger results would be unreliable. There was evidence of heterogeneity in the causal effect estimates  
189 of current-smoking status on fatigue across the individual SNPs ( $Q=29.9$ ,  $P = 0.0029$ ). There was  
190 strong evidence of directionally horizontal pleiotropy because of an abundance of asymmetry of the  
191 funnel plots (Fig B in S1 Note).

## 192 Alcohol intake-related exposures

193 *Alcohol intake status*. The two-sample MR IVW analysis showed strong evidence for a negative  
194 causal effect of never alcohol intake status on fatigue while there was no evidence for causal effect of  
195 current alcohol intake status on fatigue (Fig 4).

196 **Fig 4. The Mendelian Randomization analysis of alcohol intake-related exposures on fatigue including**  
197 **outliers.** OR = odds ratio per unit decreases in alcohol intake related phenotypes. Forest plot comparing results  
198 from inverse variance weighted, weighted median, penalized median and MR Egger methods. CI: confidence  
199 interval.

200 *Alcohol intake frequency*. The two-sample MR IVW analysis showed evidence for a positive causal  
201 effect of AIF on fatigue. This was supported by median-based and penalized MR models (Figs 3 and  
202 4).

203 There was evidence of heterogeneity in the causal effect estimates of AIF on fatigue across the  
204 individual SNPs ( $Q=232.6$ ,  $P = 1.15 \times 10^{-15}$ ). The estimate of the intercept of MR Egger regression  
205 showed strong evidence of directionally horizontal pleiotropy for AIF exposure (Egger intercept was  
206 0.003 and its p-value was  $8.43 \times 10^{-5}$ ). There was an abundant asymmetry of the funnel plots (Fig C  
207 in S1 Note), suggesting there was directionally horizontal pleiotropy among our data.

## 208 **Discussions**

### 209 **Smoking status**

210 We found strong evidence of negative causal effect of never-smoking status on fatigue and  
211 positive causal effect of current-smoking status on fatigue. The causal effect size estimates were  
212 consistent across the different sensitivity methods applied, and did not depend on whether or not  
213 there was direct pleiotropy in the analyses. Sensitivity analysis was performed with MR Egger  
214 regression, the weighted median estimator, and penalized median estimator. These analyses were  
215 consistent with the results from the IVW analyses. Thus, we generated that smoking is a risk factor to  
216 fatigue.

217 In former observational studies, smoking status has been associated with self-reported  
218 tiredness. Subjects who were heavy cigarette smokers were prone to fatigue. But this effect is only  
219 specific to the limited age range of participants rather than a broad population [28-30]. The effect  
220 estimates in observational study and our MR study are similar, providing additional confidence in our  
221 results. Our MR analysis goes one step further than observational studies. The former observational

## Mendelian randomization study of lifestyle factors on self-report tiredness

222 studies focused on healthy young males; our MR studies extended the sample to a wider range  
223 without age and gender limits.

224 Potential complication in interpreting the results of these sorts of MR analyses is the extent to  
225 which one can be sure that the causal estimates reflect the effect of smoking on energy levels. Low  
226 energy level refers to fatigue. Nicotine exposure from cigarette smoking can cause a negative energy  
227 state which is characterized by reducing energy intake and increasing energy expenditure. Energy  
228 intake and expenditure depend on brain feeding regulation [31, 32]. Nicotine can influence caloric  
229 consumption and energy expenditure by promoting the release of norepinephrine, serotonin, and  
230 other factors. These factors influence the brain to alter appetite and metabolic rate [32-35].

231 It is also possible that the causal estimates could reflect the effect of nicotine exposure on the  
232 increase of myocardial contractility and vasoconstriction, which results in increasing myocardial  
233 work and oxygen requirement and reducing coronary and cerebral blood flow [36]. Poor blood flow  
234 causes low energy level and then fatigue. Also, the heart must pump harder when circulation is poor,  
235 which can lead to further fatigue.

236 Our study has proved that smoking increases the risk of fatigue, and never-smoking reduces  
237 the risk. Different smoking status will produce different gene expression patterns [37]. Smokers are  
238 prone to fatigue.

### 239 **Alcohol intake-related exposures**

240 *Alcohol intake status.* Evidence is lacking for causal effect of current-drinking status on fatigue. In  
241 contrast, we found some evidence of an inverse effect of never-drinking status on fatigue. Such  
242 inconsistency of causal effect detection for alcohol intake may result from small number of SNPs  
243 associated with alcohol drinker statuses, which limits capacity to test causal effect [38].

244 *Alcohol intake frequency.* Evidence is enough for a causal relationship between AIF and fatigue. We  
245 found there is a statistically significant causal effect of AIF on fatigue. The causal effect size  
246 estimates of MR Egger regression were inconsistent across other different sensitivity methods  
247 applied. The low  $I_{GX}^2$  for AIF partly indicated that sensitivity analysis of the resulting MR Egger  
248 regression was unreliable. The analyses from alternative pleiotropy-robust estimation strategies  
249 (including the weighted median estimator and penalized weighted model), complementary to MR  
250 Egger regression [39], were consistent with the results from the IVW analyses. The causal effect size  
251 estimate did not depend on whether or not there is direct pleiotropy in the analyses.

252 Results from this study are consistent with previous conventional epidemiological studies  
253 which have associated alcohol intake with an increased risk of fatigue. But little evidence shows  
254 these apparently association may be causal [40]. Also, the subjects were drawn from a special fatigue  
255 clinic, so results cannot be generalised to other settings [40, 41]. Our MR study has extended this  
256 associate relationship to a causal one for a broad population without age and gender limits.

257 A significant causal relationship between alcohol intake and fatigue would reflect the  
258 detrimental effect level of alcohol on human physiology. Alcohol use actually inhibits the absorption  
259 and usage of vital nutrients such as vitamin B1, vitamin B12, folic acid, and zinc. Zinc is also  
260 essential to energy metabolic processes [42, 43]. Drinking alcohol constricts aerobic metabolism and  
261 decreases in hepatic ATP synthesis [44]. Thus the physical responses to alcohol in the body can lead  
262 to a feeling of fatigue and weakness.

## 263 **Strengths and limitations**

264 One of the strengths of our MR study was the ability to select a large-scale SAIE GWAS data  
265 set as shown in Table J in S1 Table and fatigue (N =449,019 individuals reporting their tiredness) in  
266 two-sample MR approach to estimate the effect of smoking status on fatigue, which helps overcome

## Mendelian randomization study of lifestyle factors on self-report tiredness

267 power limitations of MR. Second, participants in all the GWAS datasets are of European decent,  
268 which may reduce the influence on potential association caused by population stratification. The third  
269 strength is that we performed a series of sensitivity analyses to explore potential bias due to  
270 horizontal pleiotropy.

271 Due to the lack of relevant data, an important limitation with this study is that confounders  
272 associated with exposures in our MR study were not explored. Besides, the small number of genetic  
273 instruments for some traits may have introduced weak instrument bias.

274 Our findings support several potential recommendations. In spite of the complexity of fatigue,  
275 individuals can still prevent it by changing lifestyles to reduce fatigue risks, such as smoking and  
276 alcohol intake cessation.

## 277 **Conclusion**

278 We found evidence for a causal effect of heavier alcohol intake on increasing the risk of  
279 fatigue. In addition, evidence is sufficient for a positive causal relationship of cigarette smoking on  
280 fatigue. The resulting MR analyses are consistent with previous observational studies with their  
281 relatively small sample size and the limited age range of participants.

282

283

## 284 **Acknowledgments**

285 This research has been conducted using the UK Biobank Resource and IEU open GWAS  
286 summary data. We would like to thank Ph.D. candidate Tao Wang from Peking University for help  
287 with statistical analyses.

288

289

## 290 **Reference**

- 291 1. Boter H, Mänty M, Hansen AM, Hortobágyi T, Avlund K. Self-reported fatigue and physical  
292 function in late mid-life. *J Rehabil Med.* 2014 Jul;46(7):684-90. doi: 10.2340/16501977-1814.
- 293 2. Deary V, Hagenaars SP, Harris SE, Hill WD, Davies G, Liewald DCM; International  
294 Consortium for Blood Pressure GWAS; CHARGE Consortium Aging and Longevity Group;  
295 CHARGE Consortium Inflammation Group, McIntosh AM, Gale CR, Deary IJ. Genetic  
296 contributions to self-reported tiredness. *Mol Psychiatry.* 2018 Mar;23(3):609-620. doi:  
297 10.1038/mp.2017.5.
- 298 3. Schwarz R, Krauss O, Hinz A. Fatigue in the general population. *Onkologie.* 2003  
299 Apr;26(2):140-4. doi: 10.1159/000069834.
- 300 4. Hagelin CL, Wengström Y, Runesdotter S, Furst CJ. The psychometric properties of the  
301 Swedish Multidimensional Fatigue Inventory MFI-20 in four different populations. *Acta*  
302 *Oncol.* 2007;46(1):97-104. doi: 10.1080/02841860601009430.
- 303 5. Watt T, Groenvold M, Bjorner JB, Noerholm V, Rasmussen NA, Bech P. Fatigue in the  
304 Danish general population. Influence of sociodemographic factors and disease. *J Epidemiol*  
305 *Community Health.* 2000 Nov;54(11):827-33. doi: 10.1136/jech.54.11.827.
- 306 6. Cullen W, Kearney Y, Bury G. Prevalence of fatigue in general practice. *Ir J Med Sci.* 2002  
307 Jan-Mar;171(1):10-2. doi: 10.1007/BF03168931.
- 308 7. Ridsdale L, Evans A, Jerrett W, Mandalia S, Osler K, Vora H. Patients with fatigue in general  
309 practice: a prospective study. *BMJ.* 1993 Jul 10;307(6896):103-6. doi:  
310 10.1136/bmj.307.6896.103.
- 311 8. Mota DD, Pimenta CA. Self-report instruments for fatigue assessment: a systematic review.

## Mendelian randomization study of lifestyle factors on self-report tiredness

- 312 Res Theory Nurs Pract. 2006 Spring;20(1):49-78. doi: 10.1891/rtnp.20.1.49.
- 313 9. Engberg I, Segerstedt J, Waller G, Wennberg P, Eliasson M. Fatigue in the general  
314 population- associations to age, sex, socioeconomic status, physical activity, sitting time and  
315 self-rated health: the northern Sweden MONICA study 2014. BMC Public Health. 2017 Aug  
316 14;17(1):654. doi: 10.1186/s12889-017-4623-y.
- 317 10. Smith GD, Ebrahim S. 'Mendelian randomization': can genetic epidemiology contribute to  
318 understanding environmental determinants of disease? Int J Epidemiol. 2003 Feb;32(1):1-22.  
319 doi: 10.1093/ije/dyg070.
- 320 11. Davey Smith G, Hemani G. Mendelian randomization: genetic anchors for causal inference in  
321 epidemiological studies. Hum Mol Genet. 2014 Sep 15;23(R1):R89-98. doi:  
322 10.1093/hmg/ddu328.
- 323 12. Evans DM, Davey Smith G. Mendelian Randomization: New Applications in the Coming  
324 Age of Hypothesis-Free Causality. Annu Rev Genomics Hum Genet. 2015;16:327-50. doi:  
325 10.1146/annurev-genom-090314-050016.
- 326 13. Nijrolder I, van der Windt D, de Vries H, van der Horst H. Diagnoses during follow-up of  
327 patients presenting with fatigue in primary care. CMAJ. 2009 Nov 10;181(10):683-7. doi:  
328 10.1503/cmaj.090647.
- 329 14. Emdin CA, Khera AV, Natarajan P, Klarin D, Zekavat SM, Hsiao AJ, et al. Genetic  
330 Association of Waist-to-Hip Ratio With Cardiometabolic Traits, Type 2 Diabetes, and  
331 Coronary Heart Disease. JAMA. 2017 Feb 14;317(6):626-634. doi: 10.1001/jama.2016.21042.
- 332 15. Larsson SC, Burgess S, Michaëlsson K. Association of Genetic Variants Related to Serum  
333 Calcium Levels With Coronary Artery Disease and Myocardial Infarction. JAMA. 2017 Jul

- 334 25;318(4):371-380. doi: 10.1001/jama.2017.8981.
- 335 16. Clarke PS, Windmeijer F. Instrumental variable estimators for binary outcomes. *J Am Stat*  
336 *Assoc.* 2012;107:1638–1652.DOI: 10.1080/01621459.2012.734171.
- 337 17. Latvala A, Ollikainen M. Mendelian randomization in (epi)genetic epidemiology: an effective  
338 tool to be handled with care. *Genome Biol.* 2016 Jul 14;17(1):156. doi: 10.1186/s13059-016-  
339 1018-9.
- 340 18. Burgess S, Butterworth A, Thompson SG. Mendelian randomization analysis with multiple  
341 genetic variants using summarized data. *Genet Epidemiol.* 2013 Nov;37(7):658-65. doi:  
342 10.1002/gepi.21758.
- 343 19. Lawlor DA. Commentary: Two-sample Mendelian randomization: opportunities and  
344 challenges. *Int J Epidemiol.* 2016 Jun;45(3):908-15. doi: 10.1093/ije/dyw127.
- 345 20. Hemani G, Zheng J, Elsworth B, Wade KH, Haberland V, Baird D, et al. The MR-Base  
346 platform supports systematic causal inference across the human phenome. *Elife.* 2018 May  
347 30;7:e34408. doi: 10.7554/eLife.34408.
- 348 21. Bowden J, Del Greco M F, Minelli C, Zhao Q, Lawlor DA, Sheehan NA, Thompson J,  
349 Davey Smith G. Improving the accuracy of two-sample summary-data Mendelian  
350 randomization: moving beyond the NOME assumption. *Int J Epidemiol.* 2019 Jun  
351 1;48(3):728-742. doi: 10.1093/ije/dyy258.
- 352 22. Burgess S, Bowden J, Fall T, Ingelsson E, Thompson SG. Sensitivity Analyses for Robust  
353 Causal Inference from Mendelian Randomization Analyses with Multiple Genetic Variants.  
354 *Epidemiology.* 2017 Jan;28(1):30-42. doi: 10.1097/EDE.0000000000000559.
- 355 23. Pierce BL, Burgess S. Efficient design for Mendelian randomization studies: subsample and  
356 2-sample instrumental variable estimators. *Am J Epidemiol.* 2013 Oct 1;178(7):1177-84. doi:  
357 10.1093/aje/kwt084.



## Mendelian randomization study of lifestyle factors on self-report tiredness

- 358 24. Bowden J, Davey Smith G, Haycock PC, Burgess S. Consistent Estimation in Mendelian  
359 Randomization with Some Invalid Instruments Using a Weighted Median Estimator. *Genet*  
360 *Epidemiol.* 2016 May;40(4):304-14. doi: 10.1002/gepi.21965.
- 361 25. Bowden J, Davey Smith G, Burgess S. Mendelian randomization with invalid instruments:  
362 effect estimation and bias detection through Egger regression. *Int J Epidemiol.* 2015  
363 Apr;44(2):512-25. doi: 10.1093/ije/dyv080.
- 364 26. Bowden J, Del Greco M F, Minelli C, Davey Smith G, Sheehan NA, Thompson JR.  
365 Assessing the suitability of summary data for two-sample Mendelian randomization analyses  
366 using MR-Egger regression: the role of the I<sup>2</sup> statistic. *Int J Epidemiol.* 2016 Dec  
367 1;45(6):1961-1974. doi: 10.1093/ije/dyw220.
- 368 27. Moen GH, Beaumont RN, Grarup N, Sommer C, Shields BM, Lawlor DA, et al. Investigating  
369 the causal effect of maternal vitamin B12 and folate levels on offspring birthweight. *Int J*  
370 *Epidemiol.* 2021 Mar 3;50(1):179-189. doi: 10.1093/ije/dyaa256.
- 371 28. Corwin EJ, Klein LC, Rickelman K. Predictors of fatigue in healthy young adults: moderating  
372 effects of cigarette smoking and gender. *Biol Res Nurs.* 2002 Apr;3(4):222-33. doi:  
373 10.1177/109980040200300407.
- 374 29. Juster RP, McEwen BS, Lupien SJ. Allostatic load biomarkers of chronic stress and impact on  
375 health and cognition. *Neurosci Biobehav Rev.* 2010 Sep;35(1):2-16. doi:  
376 10.1016/j.neubiorev.2009.10.002.
- 377 30. Bremander A, Jacobsson LT, Bergman S, Haglund E, Löfvendahl S, Petersson IF. Smoking is  
378 associated with a worse self-reported health status in patients with psoriatic arthritis: data  
379 from a Swedish population-based cohort. *Clin Rheumatol.* 2015 Mar;34(3):579-83. doi:  
380 10.1007/s10067-014-2742-8.

- 381 31. Hellerstein MK, Benowitz NL, Neese RA, Schwartz JM, Hoh R, Jacob P 3rd, et al. Effects of  
382 cigarette smoking and its cessation on lipid metabolism and energy expenditure in heavy  
383 smokers. *J Clin Invest.* 1994 Jan;93(1):265-72. doi: 10.1172/JCI116955.
- 384 32. Chen H, Saad S, Sandow SL, Bertrand PP. Cigarette smoking and brain regulation of energy  
385 homeostasis. *Front Pharmacol.* 2012 Jul 25;3:147. doi: 10.3389/fphar.2012.00147.
- 386 33. Churg A, Dai J, Tai H, Xie C, Wright JL. Tumor necrosis factor-alpha is central to acute  
387 cigarette smoke-induced inflammation and connective tissue breakdown. *Am J Respir Crit*  
388 *Care Med.* 2002 Sep 15;166(6):849-54. doi: 10.1164/rccm.200202-097OC.
- 389 34. Audrain-McGovern J, Benowitz NL. Cigarette smoking, nicotine, and body weight. *Clin*  
390 *Pharmacol Ther.* 2011 Jul;90(1):164-8. doi: 10.1038/clpt.2011.105.
- 391 35. Stojakovic A, Espinosa EP, Farhad OT, Lutfy K. Effects of nicotine on homeostatic and  
392 hedonic components of food intake. *J Endocrinol.* 2017 Oct;235(1):R13-R31. doi:  
393 10.1530/JOE-17-0166.
- 394 36. Rigotti NA, Clair C. Managing tobacco use: the neglected cardiovascular disease risk factor.  
395 *Eur Heart J.* 2013 Nov;34(42):3259-67. doi: 10.1093/eurheartj/eh352.
- 396 37. Vink JM, Jansen R, Brooks A, Willemsen G, van Grootheest G, de Geus E, et al. Differential  
397 gene expression patterns between smokers and non-smokers: cause or consequence? *Addict*  
398 *Biol.* 2017 Mar;22(2):550-560. doi: 10.1111/adb.12322.
- 399 38. Brion MJ, Shakhbazov K, Visscher PM. Calculating statistical power in Mendelian  
400 randomization studies. *Int J Epidemiol.* 2013 Oct;42(5):1497-501. doi: 10.1093/ije/dyt179.
- 401 39. Bowden J. Misconceptions on the use of MR-Egger regression and the evaluation of the  
402 InSIDE assumption. *Int J Epidemiol.* 2017 Dec 1;46(6):2097-2099. doi: 10.1093/ije/dyx192.
- 403 40. Woolley J, Allen R, Wessely S. Alcohol use in chronic fatigue syndrome. *J Psychosom Res.*  
404 2004 Feb;56(2):203-6. doi: 10.1016/S0022-3999(03)00077-1.

## Mendelian randomization study of lifestyle factors on self-report tiredness

- 405 41. Vella LD, Cameron-Smith D. Alcohol, athletic performance and recovery. *Nutrients*. 2010  
406 Aug;2(8):781-9. doi: 10.3390/nu2080781.
- 407 42. Skalny AV, Skalnaya MG, Grabeklis AR, Skalnaya AA, Tinkov AA. Zinc deficiency as a  
408 mediator of toxic effects of alcohol abuse. *Eur J Nutr*. 2018 Oct;57(7):2313-2322. doi:  
409 10.1007/s00394-017-1584-y.
- 410 43. Liuzzi JP, Narayanan V, Doan H, Yoo C. Effect of zinc intake on hepatic autophagy during  
411 acute alcohol intoxication. *Biometals*. 2018 Apr;31(2):217-232. doi: 10.1007/s10534-018-  
412 0077-7.
- 413 44. Mitchell MC, Herlong HF. Alcohol and nutrition: caloric value, bioenergetics, and  
414 relationship to liver damage. *Annu Rev Nutr*. 1986;6:457-74. doi:  
415 10.1146/annurev.nu.06.070186.002325.

## 416 **Supporting information**

### 417 **S1 Table. Supplementary tables.**

418 Table A: Effect of SNPs on alcohol intake frequency and alcohol drinker status (never vs  
419 current). The statistics are derived from linear regression. The GWAS summary data in the table is  
420 from UK Biobank. The GWAS identifiers of alcohol intake frequency and alcohol drinker status  
421 (never vs current) are corresponding to ukb-b-5779, ukb-a-226 and ukb-d-20117\_2 respectively  
422 .1The effect is the mean effect of the increaser allele estimated on a quantile normalized scale. The  
423 outlying genetic instruments which had large contribution to Cochran 's Q statistics are shown in  
424 bold. EAF: effect allele frequency; SNP: single nucleotide polymorphism; SE: Standard Error;  
425 GWAS: Genome-wide association study.

426 Table B: The effect of the alcohol intake frequency and alcohol drinker status (never vs  
427 current) SNPs on self-reported tiredness. The statistics are derived from linear regression. The

## Mendelian randomization study of lifestyle factors on self-report tiredness

428 GWAS summary data in the table is from UK Biobank. The GWAS identifiers of alcohol intake  
429 frequency and alcohol drinker status (never vs current) are corresponding to ukb-b-5779, ukb-a-226  
430 and ukb-d-20117\_2 respectively .1The effect is the mean effect of the increaser allele estimated on a  
431 quantile normalized scale. EAF: effect allele frequency; SNP: single nucleotide polymorphism; SE:  
432 Standard Error; GWAS: Genome-wide association study.

433 Table C: Effect of SNPs on smoking status (never vs current). The statistic are derived from  
434 linear regression. The GWAS summary data in the table is from UK Biobank. The GWAS identifiers  
435 of smoking status (never vs current) are corresponding to ukb-d-20116\_0 and ukb-a-225 respectively  
436 .1The effect is the mean effect of the increaser allele estimated on a quantile normalized scale. The  
437 outlying genetic instruments which had large contribution to Cochran 's Q statistics are shown in  
438 bold. EAF: effect allele frequency; SNP: single nucleotide polymorphism; SE: Standard Error;  
439 GWAS: Genome-wide association study.

440 Table D: The effect of the smoking status (never vs current) SNPs on self-reported tiredness.  
441 1 The effect is the mean effect of the increaser allele estimated on a quantile normalized scale. EAF:  
442 effect allele frequency; SE: Standard Error; SNP: single nucleotide polymorphism; GWAS: Genome-  
443 wide association study.

444 Table E: Mendelian Randomization estimates of the causal effect of alcohol intake frequency  
445 on self-reported tiredness. Causal effects are estimated using four MR models: inverse variance  
446 weighted (IVW), weighted median, penalized median and MR Egger regression. Causal effect  
447 estimates are the difference in mean self-reported tiredness (in standard deviation; SD) per 1SD  
448 higher alcohol intake frequency. Significant results from Mendelian Randomization analysis are  
449 shown in bold. SE: Standard Error; IVs: Instrumental variables.

## Mendelian randomization study of lifestyle factors on self-report tiredness

450 Table F: Mendelian Randomization estimates of the causal effect of alcohol status (current)  
451 on self-reported tiredness. Causal effects are estimated using four MR models: inverse variance  
452 weighted (IVW), weighted median, penalized median and MR Egger regression. Causal effect  
453 estimates are the difference in mean self-reported tiredness (in standard deviation; SD) per 1SD  
454 higher alcohol status (current).

455 Table G: Mendelian Randomization estimates of the causal effect of smoking status (never)  
456 on self-reported tiredness. Causal effects are estimated using four MR models: inverse variance  
457 weighted (IVW), weighted median, penalized median and MR Egger regression. Causal effect  
458 estimates are the difference in mean self-reported tiredness (in standard deviation; SD) per 1SD  
459 higher alcohol status (never). Significant results from Mendelian Randomization analysis are shown  
460 in bold. SE: Standard Error; IVs: Instrumental variables.

461 Table H: Mendelian Randomization estimates of the causal effect of smoking status (current)  
462 on self-reported tiredness. Causal effects are estimated using four MR models: inverse variance  
463 weighted (IVW), weighted median, penalized median and MR Egger regression. Causal effect  
464 estimates are the difference in mean self-reported tiredness (in standard deviation; SD) per 1SD  
465 higher alcohol status (current).

466 Table I: Results of heterogeneity tests. Significant results from the heterogeneity tests are  
467 shown in bold.

468 Table J: Results of test for directional horizontal pleiotropy. Significant results from the  
469 directional horizontal pleiotropy tests are shown in bold. SE: Standard Error.

470 **S1 Note. Supplementary results.**

471 Fig A. Funnel plots for the effect of never smoking status on risk of self-reported fatigue for  
472 each single-nucleotide polymorphism (SNP), the resulting Mendelian randomization (MR) estimate  
473 is plotted against the inverse of the standard error of the MR estimate. Symmetry noted in this plot  
474 provides evidence against the presence of directional horizontal pleiotropy. The inverse-variance  
475 weighted and MR Egger causal estimates are represented by a red and blue line respectively.

476 Fig B. Funnel plots for the effect of current smoking status on risk of self-reported fatigue for  
477 each single-nucleotide polymorphism (SNP), the resulting Mendelian randomization (MR) estimate  
478 is plotted against the inverse of the standard error of the MR estimate. Symmetry noted in this plot  
479 provides evidence against the presence of directional horizontal pleiotropy. The inverse-variance  
480 weighted and MR Egger causal estimates are represented by a red and blue line respectively.

481 Fig C. Funnel plots for the effect of alcohol intake frequency on risk of self-reported fatigue  
482 for each single-nucleotide polymorphism (SNP), the resulting Mendelian randomization (MR)  
483 estimate is plotted against the inverse of the standard error of the MR estimate. Symmetry noted in  
484 this plot provides evidence against the presence of directional horizontal pleiotropy. The inverse-  
485 variance weighted and MR Egger causal estimates are represented by a red and blue line respectively.

486

487

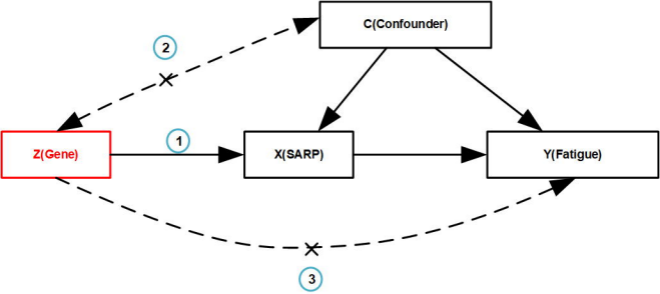

Smoking status: Current

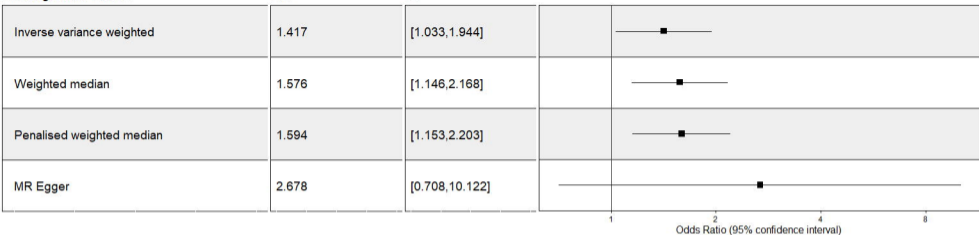

Smoking status: Never

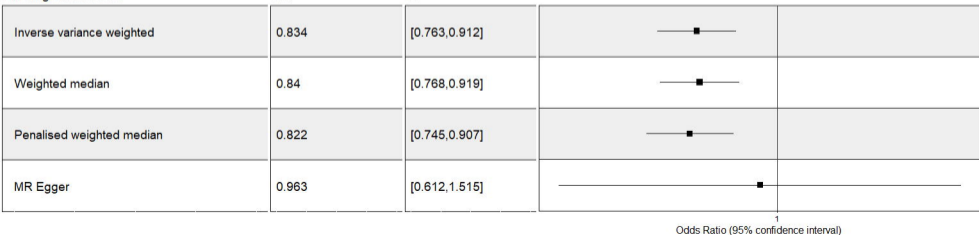



## Alcohol intake frequency.

|                           | OR    | CI            |  |  |
|---------------------------|-------|---------------|--|--|
| Inverse variance weighted | 1.081 | [1.057,1.105] |  |  |
| Weighted median           | 1.069 | [1.034,1.106] |  |  |
| Penalised weighted median | 1.069 | [1.032,1.108] |  |  |
| MR Egger                  | 1.05  | [0.971,1.135] |  |  |

1

Odds Ratio (95% confidence interval)

## Smoking status: Current

|                           | OR    | CI            |  |  |
|---------------------------|-------|---------------|--|--|
| Inverse variance weighted | 1.53  | [1.138,2.057] |  |  |
| Weighted median           | 1.595 | [1.146,2.219] |  |  |
| Penalised weighted median | 1.595 | [1.15,2.21]   |  |  |
| MR Egger                  | 2.03  | [0.611,6.744] |  |  |

1

Odds Ratio (95% confidence interval)

## Smoking status: Never

|                           | OR    | CI            |  |  |
|---------------------------|-------|---------------|--|--|
| Inverse variance weighted | 0.84  | [0.786,0.897] |  |  |
| Weighted median           | 0.839 | [0.762,0.924] |  |  |
| Penalised weighted median | 0.839 | [0.762,0.924] |  |  |
| MR Egger                  | 0.814 | [0.589,1.124] |  |  |

1

Odds Ratio (95% confidence interval)

## Alcohol intake frequency.

|                           | OR    | CI            |  |
|---------------------------|-------|---------------|--|
| Inverse variance weighted | 1.062 | [1.033,1.091] |  |
| Weighted median           | 1.057 | [1.023,1.092] |  |
| Penalised weighted median | 1.08  | [1.044,1.117] |  |
| MR Egger                  | 0.958 | [0.907,1.012] |  |

Odds Ratio (95% confidence interval)

## Alcohol drinker status: Current

|                           | OR    | CI             |  |
|---------------------------|-------|----------------|--|
| Inverse variance weighted | 2.068 | [0.812,5.267]  |  |
| Weighted median           | 2.154 | [0.928,4.999]  |  |
| Penalised weighted median | 2.154 | [0.922,5.03]   |  |
| MR Egger                  | 6.268 | [0.752,52.266] |  |

Odds Ratio (95% confidence interval)

## Alcohol drinker status: Never

|            | OR    | CI            |  |
|------------|-------|---------------|--|
| Wald ratio | 0.283 | [0.127,0.631] |  |

Odds Ratio (95% confidence interval)
